# Supplementary material
Source: PubMed Central journal article supplement (PMC6317856)
Supplement: NIHMS961025-supplement-Supplementary_Materials__figures__tables.pdf [file NIHMS961025-supplement-Supplementary_Materials__figures__tables.pdf]

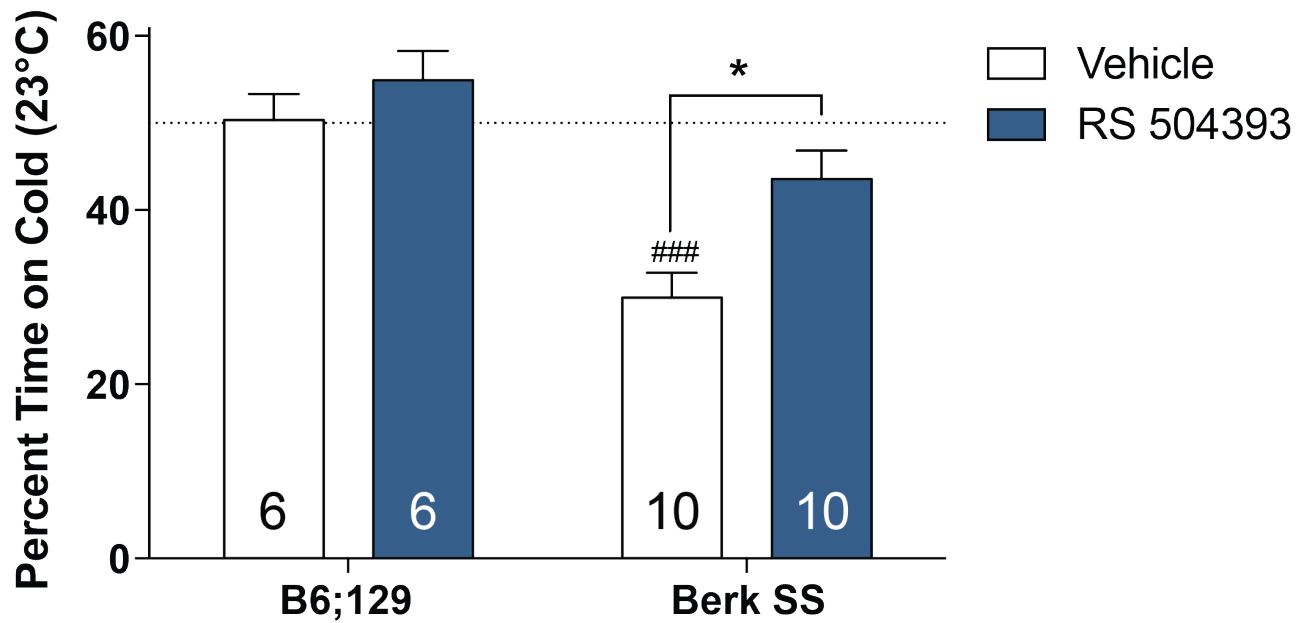

**Supplemental Figure 1 : Acute CCR2 inhibition reduces cold aversion in SCD mice.** Temperature preference was assessed in B6;129 and Berk SS mice. Vehicle-treated Berk SS mice spent significantly less time on the 23°C plate than controls; this cold aversion was mitigated by pre-treatment with the CCR2 antagonist RS 504393 (two-way ANOVA significant main effect of genotype  $F_{1,28}= 23.16$ ,  $p<0.0001$ , significant main effect of RS 504393  $F_{1,28}=7.613$ ,  $p=0.0101$ ; Bonferroni multiple comparisons test B6;129 vehicle vs. Berk SS vehicle ###  $p=0.0003$ , Berk SS vehicle vs. Berk SS RS 504393 \* $p=0.0045$ ;  $n=6-10$ ). RS 504393 treatment had no effect on B6;129 temperature preference (Bonferroni multiple comparison test B6;129 vehicle vs. B6;129 RS 504393  $p=0.7665$ ).
